# Supplementary material
Source: HighWire-hosted journal article supplement (https://bmjopen.bmj.com/content/10/7/e035943)
Supplement: inline-supplementary-material-1 [file inline-supplementary-material-1.pdf]

## **Balloon versus Amplatz for Tract Dilation in Fluoroscopically Guided Percutaneous Nephrolithotomy: A Systematic Review and Meta-analysis**

Search strategy in PubMed.

The last quest was updated on October 30, 2019.

- #1 Search “percutaneous nephrolithotomy” [Mesh]
- #2 Search PCNL
- #3 Search (#1 or #2)
- #4 Search "tract dilatation" [Mesh]
- #5 Search tract dilation
- #6 Search access creation
- #7 Search (#4 or #5 or #6)
- #8 Search " balloon dilation " [Mesh]
- #9 Search balloon dilatation
- #10 Search Amplatz dilation
- #11 Search Amplatz dilatation
- #12 Search (#8 or #9 or #10 or #11)
- #13 Search (#3 and #7 and #12)
